# Supplementary material for: The DECON pilot project investigates predictive markers for successful bariatric surgery
Source: PubMed Central journal article supplement (PMC10435485; doi:10.1038/s41598-023-40452-7), 2023-08-17
Supplement: 41598_2023_40452_MOESM1_ESM.pdf [file 41598_2023_40452_MOESM1_ESM.pdf]

**Supplementary Table 1. Clinical Report Form (CRF) for the DECON pilot cohort.**

Lab values and clinical data collection form, for all the visits of the DECON pilot patients.

# CRF

## DECONvolution of Obesity

Center for Obesity and Metabolic Surgery  
Department of General and Visceral Surgery, University  
Medical Center Freiburg, University of Freiburg

Patient-ID:

Patient Initials:  /   
Name Surname

# Screening

**Patient Info:**

Date of Birth  /  / 20    
Month Year

Date of Operation  /  / 20

Gender  m  w

Height  (cm)

Weight  (kg)

BMI  (kg/m<sup>2</sup>)

# Inclusion

**Patient-ID:**                                   |\_|\_|\_|\_|

**Screening Date:**                           |\_|\_|\_|\_| / |\_|\_|\_|\_| / 20|\_|\_|\_|\_|  
Day                                   Month                                   Year

## Inclusion Criteria

|                                                                                                                                                                                                                                                                                                                                                                                                                                                                                                                                                                                                                                                                                                                                                                                    |                                                          |
|------------------------------------------------------------------------------------------------------------------------------------------------------------------------------------------------------------------------------------------------------------------------------------------------------------------------------------------------------------------------------------------------------------------------------------------------------------------------------------------------------------------------------------------------------------------------------------------------------------------------------------------------------------------------------------------------------------------------------------------------------------------------------------|----------------------------------------------------------|
| <p>The patient is at least 18 years of age and younger than 50 years of age at the time of consenting to participate in the study</p>                                                                                                                                                                                                                                                                                                                                                                                                                                                                                                                                                                                                                                              | <input type="checkbox"/> Yes <input type="checkbox"/> No |
| <p><b>BMI 30-35 and severe type 2 diabetes (Metabolic Indication)</b></p> <p><b>or</b></p> <p>BMI &gt; 40 kg/m<sup>2</sup></p> <p><b>or</b></p> <p>BMI ≥ 35-40 kg/m<sup>2</sup> <u>and</u> presence of obesity associated comorbidities such as:</p> <ul style="list-style-type: none"> <li>○ Type 2 Diabetes</li> <li>○ Arterial Hypertension</li> <li>○ Hyperlipidemia</li> <li>○ Sleep Apnea</li> <li>○ Osteoarthritis</li> <li>○ Obesity Hypoventilation Syndrome</li> <li>○ NAFLD</li> <li>○ NASH</li> <li>○ Idiopathic Intracranial Hypertension</li> <li>○ Gastroesophageal Reflux Disease</li> <li>○ Asthma</li> <li>○ Venous Stasis Disease</li> <li>○ Severe Urinary Incontinence</li> <li>○ Contraindication(s) to other necessary operations due to obesity</li> </ul> | <input type="checkbox"/> Yes <input type="checkbox"/> No |

|                     |                                                          |
|---------------------|----------------------------------------------------------|
| Signed Consent Form | <input type="checkbox"/> Yes <input type="checkbox"/> No |
| Female              | <input type="checkbox"/> Yes <input type="checkbox"/> No |
| Caucasian           | <input type="checkbox"/> Yes <input type="checkbox"/> No |

### Exclusion Criteria

|                                        |                                                          |
|----------------------------------------|----------------------------------------------------------|
| Previous bariatric surgery             | <input type="checkbox"/> Yes <input type="checkbox"/> No |
| Carcinoma in the last years            | <input type="checkbox"/> Yes <input type="checkbox"/> No |
| Severe, untreated psychiatric disorder | <input type="checkbox"/> Yes <input type="checkbox"/> No |
| Drug or alcohol abuse, liver cirrhosis | <input type="checkbox"/> Yes <input type="checkbox"/> No |

### Date Patient Information and Consent Obtained

Day   /   / 20

\_\_\_\_\_  
Ort

/   / 20     
Day Month Year

\_\_\_\_\_  
Signature (Investigator)

## Visit 1 (Pre-surgical evaluation)

|                                                                                                                                                                                                                                                  |                                                                                                                                                                                                                                                                                                                                                |
|--------------------------------------------------------------------------------------------------------------------------------------------------------------------------------------------------------------------------------------------------|------------------------------------------------------------------------------------------------------------------------------------------------------------------------------------------------------------------------------------------------------------------------------------------------------------------------------------------------|
| <p>Type 2 Diabetes</p> <ul style="list-style-type: none"> <li>• Year of diagnosis</li> <li>• Metformin</li> <li>• GLP-1 Analogue</li> <li>• Other Oral Antidiabetic Medications</li> <li>• Insulin</li> <li>• Cumulative Insulin Dose</li> </ul> | <p>.....(Year)</p> <p><input type="checkbox"/> Yes    <input type="checkbox"/> No</p> <p>.....</p>                                    |
| <p>Arterial Hypertension:</p> <ul style="list-style-type: none"> <li>• Year of diagnosis</li> <li>• Antihypertensive medication (yes/no)</li> <li>• Number of antihypertensive medications</li> </ul>                                            | <p>..... (Year)</p> <p><input type="checkbox"/> Yes    <input type="checkbox"/> No</p> <p>.....</p>                                                                                                                                                                                                                                            |
| <p>Prevalence of maternal or paternal obesity</p>                                                                                                                                                                                                | <p><input type="checkbox"/> Yes    <input type="checkbox"/> No</p>                                                                                                                                                                                                                                                                             |
| <p>History of maternal or paternal type 2 diabetes</p>                                                                                                                                                                                           | <p><input type="checkbox"/> Yes    <input type="checkbox"/> No</p>                                                                                                                                                                                                                                                                             |
| <p>Lipedema</p>                                                                                                                                                                                                                                  | <p><input type="checkbox"/> Yes    <input type="checkbox"/> No</p>                                                                                                                                                                                                                                                                             |
| <p>Lymphedema</p>                                                                                                                                                                                                                                | <p><input type="checkbox"/> Yes    <input type="checkbox"/> No</p>                                                                                                                                                                                                                                                                             |
| <p>Comorbidities (Non-Obesity Related)</p>                                                                                                                                                                                                       | <p><input type="checkbox"/> Yes    <input type="checkbox"/> No</p> <p>Which: (with year diagnosed)</p>                                                                                                                                                                                                                                         |
| <p>Post-Cholecystectomy</p> <p>Post-Ovariectomy</p> <p>Post-Hysterectomy</p> <p>Post-Thyroidectomy</p>                                                                                                                                           | <p><input type="checkbox"/> Yes    <input type="checkbox"/> No</p>                                                                    |
| <p>Smoker</p> <p>Pack-Years</p>                                                                                                                                                                                                                  | <p><input type="checkbox"/> Yes    <input type="checkbox"/> No</p>                                                                                                                                                                                                                                                                             |
| <p>Potentially confounding medication:</p> <p>Cortisone</p> <p>Thyroid Hormone</p> <p>Lipid-Lowering Drugs</p> <p>Uric Acid-Lowering Drugs</p> <p>Antidepressants</p>                                                                            | <p><input type="checkbox"/> Yes    <input type="checkbox"/> No</p> |

|                                            |    |
|--------------------------------------------|----|
| Edmonton Obesity Stage                     |    |
| Waist Circumference                        | cm |
| Hip Circumference                          | cm |
| Mid-Thigh Circumference                    | cm |
| VAS-Score (Leg Pain)                       |    |
| Total Score on B.A.R.O.S QoL questionnaire |    |

# Lab values

**Blood Test Date:**

|     |  |   |       |  |   |      |  |  |  |
|-----|--|---|-------|--|---|------|--|--|--|
|     |  | / |       |  | / | 20   |  |  |  |
| Day |  |   | Month |  |   | Year |  |  |  |

| <b>Parameter</b>        | <b>Measurement</b> | <b>Comments</b><br>in case of deviations from reference values |
|-------------------------|--------------------|----------------------------------------------------------------|
| Hemoglobin              |                    |                                                                |
| Calcium                 |                    |                                                                |
| HbA1C Level             |                    |                                                                |
| Serum Creatinine        |                    |                                                                |
| Serum Albumin           |                    |                                                                |
| Total Protein           |                    |                                                                |
| C-Reactive Protein      |                    |                                                                |
| Iron                    |                    |                                                                |
| Transferrin             |                    |                                                                |
| Folic Acid              |                    |                                                                |
| Vitamin B <sub>1</sub>  |                    |                                                                |
| Vitamin D <sub>3</sub>  |                    |                                                                |
| Vitamin B <sub>12</sub> |                    |                                                                |
| Uric Acid               |                    |                                                                |
| Total Cholesterol       |                    |                                                                |
| LDL                     |                    |                                                                |
| HDL                     |                    |                                                                |
| Triglyceride            |                    |                                                                |
| β-HCG*                  |                    |                                                                |

\* Only women of child bearing age (i.e., non-menopausal)



# Operation

## Type of surgery:

**Sleeve**  Yes  No

**Banded Sleeve**  Yes  No

**Gastric Bypass**  Yes  No

Biliopancreatic limb length:

Alimentary limb length:

**Banded Gastric Bypass**  Yes  No

**Date of Operation:**

|     |   |       |      |
|-----|---|-------|------|
| _   | / | _ /20 | _    |
| Day |   | Month | Year |

## Subjective Operation Difficulty Scale (SODS)

1  2  3  4  5  6  7  8  9  10

**Patient-ID:**

|   |   |   |   |
|---|---|---|---|
| _ | _ | _ | _ |
|---|---|---|---|

**Patient-Initials:**

|      |   |         |   |   |
|------|---|---------|---|---|
| _    | _ | /       | _ | _ |
| Name |   | Surname |   |   |

**Sample No. Adipose Tissue:**

**Subcut.**

|   |   |   |   |
|---|---|---|---|
| _ | _ | _ | _ |
|---|---|---|---|

**Visceral**

|   |   |   |   |
|---|---|---|---|
| _ | _ | _ | _ |
|---|---|---|---|

**Sample No. Liver:**

|   |   |   |   |
|---|---|---|---|
| _ | _ | _ | _ |
|---|---|---|---|

**Sample No. Blood:**

|   |   |   |   |
|---|---|---|---|
| _ | _ | _ | _ |
|---|---|---|---|

**Sample No. Stool:**

|   |   |   |   |
|---|---|---|---|
| _ | _ | _ | _ |
|---|---|---|---|

## Visit 2 (Discharge)

Discharge date:

|     |   |   |       |   |   |      |   |   |
|-----|---|---|-------|---|---|------|---|---|
| _   | _ | / | _     | _ | / | 20   | _ | _ |
| Day |   |   | Month |   |   | Year |   |   |

Patient-ID:

|   |   |   |   |   |
|---|---|---|---|---|
| _ | _ | _ | _ | _ |
|---|---|---|---|---|

Patient-Initials:

|      |   |   |         |   |   |
|------|---|---|---------|---|---|
| _    | _ | / | _       | _ | _ |
| Name |   |   | Surname |   |   |

## Lab values (2. Postop Day)

Blood Test Date:

|     |   |   |       |   |   |      |   |   |
|-----|---|---|-------|---|---|------|---|---|
| _   | _ | / | _     | _ | / | 20   | _ | _ |
| Day |   |   | Month |   |   | Year |   |   |

| Parameter          | Measurement | Comments<br>in case of deviations from<br>reference values |
|--------------------|-------------|------------------------------------------------------------|
| C-Reactive Protein |             |                                                            |

|                              |                                                             |
|------------------------------|-------------------------------------------------------------|
| Postoperative Length of Stay |                                                             |
| Surgical Revision            | <input type="checkbox"/> Yes<br><input type="checkbox"/> No |
| Endoscopic Treatment         | <input type="checkbox"/> Yes<br><input type="checkbox"/> No |
| Drain Placement              | <input type="checkbox"/> Yes<br><input type="checkbox"/> No |

|                            |                                                             |                                      |
|----------------------------|-------------------------------------------------------------|--------------------------------------|
| <b>Adverse events (UE)</b> | Yes <input type="checkbox"/><br>No <input type="checkbox"/> | Yes → Fill out UE Protocol<br><br>No |
|----------------------------|-------------------------------------------------------------|--------------------------------------|

**Additional Notes:**

## Visit 4 (3 months post-surgery)

Date:

|     |   |   |       |   |   |      |   |   |
|-----|---|---|-------|---|---|------|---|---|
| _   | _ | / | _     | _ | / | 20   | _ | _ |
| Day |   |   | Month |   |   | Year |   |   |

Patient-ID:

|   |   |   |   |   |   |
|---|---|---|---|---|---|
| _ | _ | _ | _ | _ | _ |
|---|---|---|---|---|---|

Patient-Initials:

|      |   |   |         |   |   |
|------|---|---|---------|---|---|
| _    | _ | / | _       | _ | _ |
| Name |   |   | Surname |   |   |

## Lab values

**Blood Test Date:**

|     |   |   |       |   |   |      |   |   |
|-----|---|---|-------|---|---|------|---|---|
| _   | _ | / | _     | _ | / | 20   | _ | _ |
| Day |   |   | Month |   |   | Year |   |   |

| Parameter           | Measurement | Comments<br>in case of deviations from<br>reference values |
|---------------------|-------------|------------------------------------------------------------|
| Hemoglobin          | _____g/dl   |                                                            |
| Ferritin            |             |                                                            |
| Calcium             | _____mmol/l |                                                            |
| Parathyroid Hormone |             |                                                            |
| Vitamin D           |             |                                                            |
| Vitamin B12         |             |                                                            |
| HbA1C               | _____%      |                                                            |
| Serum Creatinine    | _____mg/dl  |                                                            |
| C-Reactive Protein  |             |                                                            |

Sample No. Blood:

|   |   |   |   |   |   |
|---|---|---|---|---|---|
| _ | _ | _ | _ | _ | _ |
|---|---|---|---|---|---|

## Clinical Evaluation

|                                                                                                                                                                                                              |                                                                                                                                                                                                                                                       |                                                                                                                                                       |
|--------------------------------------------------------------------------------------------------------------------------------------------------------------------------------------------------------------|-------------------------------------------------------------------------------------------------------------------------------------------------------------------------------------------------------------------------------------------------------|-------------------------------------------------------------------------------------------------------------------------------------------------------|
| Weight                                                                                                                                                                                                       |                                                                                                                                                                                                                                                       | kg                                                                                                                                                    |
| Typ 2 Diabetes <ul style="list-style-type: none"> <li>• Metformin</li> <li>• GLP-1 Analoga</li> <li>• Other Oral Antidiabetic Medication(s)</li> <li>• Insulin</li> <li>• Cumulative Insulin Dose</li> </ul> | <input type="checkbox"/> Yes <input type="checkbox"/> No<br><input type="checkbox"/> Yes <input type="checkbox"/> No<br><input type="checkbox"/> Yes <input type="checkbox"/> No<br><input type="checkbox"/> Yes <input type="checkbox"/> No<br>..... |                                                                                                                                                       |
| Arterial Hypertension with: <ul style="list-style-type: none"> <li>• Antihypertensive Medication (yes/no)</li> <li>• Number of Antihypertensive Medications</li> </ul>                                       | <input type="checkbox"/> Yes <input type="checkbox"/> No<br>.....                                                                                                                                                                                     |                                                                                                                                                       |
| Vomiting / Regurgitation                                                                                                                                                                                     |                                                                                                                                                                                                                                                       | No<br>≥ 1/ Week<br>≥ 1/ Month                                                                                                                         |
| Dysphagia (degree)                                                                                                                                                                                           |                                                                                                                                                                                                                                                       | 0: Normal foods tolerated<br>1: Some solid foods tolerated<br>2: Only soft foods tolerated<br>3: Only liquid foods tolerated<br>4: Complete dysphagia |
| Heartburn / Acid Reflux                                                                                                                                                                                      |                                                                                                                                                                                                                                                       | No<br>≥ 1/ Week<br>≥ 1/ Month                                                                                                                         |
| Smoker                                                                                                                                                                                                       |                                                                                                                                                                                                                                                       | <input type="checkbox"/> Yes <input type="checkbox"/> No                                                                                              |
| Pack-Years                                                                                                                                                                                                   |                                                                                                                                                                                                                                                       |                                                                                                                                                       |
| Total Score B.A.R.O.S QoL questionnaire                                                                                                                                                                      |                                                                                                                                                                                                                                                       |                                                                                                                                                       |
| Potentially confounding medication:                                                                                                                                                                          |                                                                                                                                                                                                                                                       |                                                                                                                                                       |
| Cortisone                                                                                                                                                                                                    |                                                                                                                                                                                                                                                       | <input type="checkbox"/> Yes <input type="checkbox"/> No                                                                                              |
| Thyroid Hormone                                                                                                                                                                                              |                                                                                                                                                                                                                                                       | <input type="checkbox"/> Yes <input type="checkbox"/> No                                                                                              |
| Lipid-Lowering Drugs                                                                                                                                                                                         |                                                                                                                                                                                                                                                       | <input type="checkbox"/> Yes <input type="checkbox"/> No                                                                                              |
| Uric Acid-Lowering Drugs                                                                                                                                                                                     |                                                                                                                                                                                                                                                       | <input type="checkbox"/> Yes <input type="checkbox"/> No                                                                                              |

|                 |                                                          |
|-----------------|----------------------------------------------------------|
| Antidepressants | <input type="checkbox"/> Yes <input type="checkbox"/> No |
|-----------------|----------------------------------------------------------|

|                                                      |                                                             |
|------------------------------------------------------|-------------------------------------------------------------|
| <b>Dumping Syndrome</b>                              | <input type="checkbox"/> Yes<br><input type="checkbox"/> No |
| <b>Endoscopic Treatment (e.g., Dilatation, BARS)</b> | <input type="checkbox"/> Yes<br><input type="checkbox"/> No |
| <b>Cholecystectomy</b>                               | <input type="checkbox"/> Yes<br><input type="checkbox"/> No |
| <b>Bariatric Revision Surgery</b>                    | <input type="checkbox"/> Yes<br><input type="checkbox"/> No |

|                            |                              |                            |
|----------------------------|------------------------------|----------------------------|
| <b>Adverse events (UE)</b> | Yes <input type="checkbox"/> | Yes → Fill out UE Protocol |
|                            | No <input type="checkbox"/>  |                            |

**Space for Notes:**



## Visit 5 (6 months post-surgery)

Date:

|     |   |   |       |   |   |      |   |   |
|-----|---|---|-------|---|---|------|---|---|
| _   | _ | / | _     | _ | / | 20   | _ | _ |
| Day |   |   | Month |   |   | Year |   |   |

Patient-ID:

|   |   |   |   |   |   |
|---|---|---|---|---|---|
| _ | _ | _ | _ | _ | _ |
|---|---|---|---|---|---|

Patient-Initials:

|      |   |   |   |         |   |   |
|------|---|---|---|---------|---|---|
| _    | _ | / | _ | _       | _ | _ |
| Name |   |   |   | Surname |   |   |

## Lab values

Blood Test Date:

|     |   |   |       |   |   |      |   |   |
|-----|---|---|-------|---|---|------|---|---|
| _   | _ | / | _     | _ | / | 20   | _ | _ |
| Day |   |   | Month |   |   | Year |   |   |

| Parameter           | Measurement | Comments<br>in case of deviations from<br>reference values |
|---------------------|-------------|------------------------------------------------------------|
| Hemoglobin          | _____g/dl   |                                                            |
| Ferritin            |             |                                                            |
| Calcium             | _____mmol/l |                                                            |
| Parathyroid Hormone |             |                                                            |
| Vitamin D           |             |                                                            |
| Vitamin B12         |             |                                                            |
| HbA1C               | _____%      |                                                            |
| Serum Creatinine    | _____mg/dl  |                                                            |
| C-Reactive Protein  |             |                                                            |

Sample No. Blood:

|   |   |   |   |   |   |
|---|---|---|---|---|---|
| _ | _ | _ | _ | _ | _ |
|---|---|---|---|---|---|



## Clinical evaluation

|        |                   |
|--------|-------------------|
| Weight | kg                |
| BMI    | kg/m <sup>2</sup> |

|                                                                                                                                                                                                                                                  |                                                                                                                                                                                                                                                                                                                                       |
|--------------------------------------------------------------------------------------------------------------------------------------------------------------------------------------------------------------------------------------------------|---------------------------------------------------------------------------------------------------------------------------------------------------------------------------------------------------------------------------------------------------------------------------------------------------------------------------------------|
| <b>Typ 2 Diabetes</b> <ul style="list-style-type: none"> <li>• First Diagnosed with Diabetes</li> <li>• Metformin</li> <li>• GLP-1 Analogue</li> <li>• Other Oral Antidiabetics</li> <li>• Insulin</li> <li>• Cumulative Insulin Dose</li> </ul> | <p style="text-align: right;">.....(Year)</p> <input type="checkbox"/> Yes <input type="checkbox"/> No<br><input type="checkbox"/> Yes <input type="checkbox"/> No<br><input type="checkbox"/> Yes <input type="checkbox"/> No<br><input type="checkbox"/> Yes <input type="checkbox"/> No<br><p style="text-align: right;">.....</p> |
| <b>Arterial Hypertension:</b> <ul style="list-style-type: none"> <li>• Antihypertensive Medication (yes/no)</li> <li>• Number of Antihypertensive Medications</li> </ul>                                                                         | <input type="checkbox"/> Yes <input type="checkbox"/> No<br><p style="text-align: right;">.....</p>                                                                                                                                                                                                                                   |
| <b>Vomiting / Regurgitation</b>                                                                                                                                                                                                                  | No<br>≥ 1/ Week<br>≥ 1/ Month                                                                                                                                                                                                                                                                                                         |
| <b>Dysphagia (degree)</b>                                                                                                                                                                                                                        | 0: Normal foods tolerated<br>1: Some solid foods tolerated<br>2: Only soft foods tolerated<br>3: Only liquid foods tolerated<br>4: Complete dysphagia                                                                                                                                                                                 |
| <b>Heartburn / Acid Reflux</b>                                                                                                                                                                                                                   | No<br>≥ 1/ Week<br>≥ 1/ Month                                                                                                                                                                                                                                                                                                         |
| <b>Smoker</b><br>Packyears                                                                                                                                                                                                                       | <input type="checkbox"/> Yes <input type="checkbox"/> No                                                                                                                                                                                                                                                                              |
| <b>Total Score B.A.R.O.S QoL questionnaire</b>                                                                                                                                                                                                   |                                                                                                                                                                                                                                                                                                                                       |

|                                     |                                                          |
|-------------------------------------|----------------------------------------------------------|
| Potentially confounding medication: |                                                          |
| Cortisone                           | <input type="checkbox"/> Yes <input type="checkbox"/> No |
| Thyroid Hormone                     | <input type="checkbox"/> Yes <input type="checkbox"/> No |
| Lipid-Lowering Drugs                | <input type="checkbox"/> Yes <input type="checkbox"/> No |
| Uric Acid-Lowering Drugs            | <input type="checkbox"/> Yes <input type="checkbox"/> No |

|                 |                                                          |
|-----------------|----------------------------------------------------------|
| Antidepressants | <input type="checkbox"/> Yes <input type="checkbox"/> No |
|-----------------|----------------------------------------------------------|

|                                                      |                                                             |
|------------------------------------------------------|-------------------------------------------------------------|
| <b>Dumping Syndrome</b>                              | <input type="checkbox"/> Yes<br><input type="checkbox"/> No |
| <b>Endoscopic Treatment (e.g., Dilatation, BARS)</b> | <input type="checkbox"/> Yes<br><input type="checkbox"/> No |
| <b>Cystectomy</b>                                    | <input type="checkbox"/> Yes<br><input type="checkbox"/> No |
| <b>Bariatric Revision Surgery</b>                    | <input type="checkbox"/> Yes<br><input type="checkbox"/> No |

|                                |                                                             |                                      |
|--------------------------------|-------------------------------------------------------------|--------------------------------------|
| <b>Any adverse events (UE)</b> | Yes <input type="checkbox"/><br>No <input type="checkbox"/> | Yes → Fill out UE Protocol<br><br>No |
|--------------------------------|-------------------------------------------------------------|--------------------------------------|

**Space for Notes:**

## Visit 6 (12 months post-surgery)

Date:

|     |   |       |   |      |     |   |   |
|-----|---|-------|---|------|-----|---|---|
| _   | _ | /     | _ | _    | /20 | _ | _ |
| Day |   | Month |   | Year |     |   |   |

Patient-ID:

|   |   |   |   |   |   |
|---|---|---|---|---|---|
| _ | _ | _ | _ | _ | _ |
|---|---|---|---|---|---|

Patient-Initials:

|      |   |         |   |   |   |
|------|---|---------|---|---|---|
| _    | _ | /       | _ | _ | _ |
| Name |   | Surname |   |   |   |

## Lab values

Blood Test Date:

|     |   |       |   |      |     |   |   |
|-----|---|-------|---|------|-----|---|---|
| _   | _ | /     | _ | _    | /20 | _ | _ |
| Day |   | Month |   | Year |     |   |   |

| Parameter               | Measurement | Comments<br>in case of deviations<br>from reference values |
|-------------------------|-------------|------------------------------------------------------------|
| Hemoglobin              |             |                                                            |
| Calcium                 |             |                                                            |
| HbA1C Level             |             |                                                            |
| Serum Creatinine        |             |                                                            |
| Serum Albumin           |             |                                                            |
| Total Protein           |             |                                                            |
| C-Reactive Protein      |             |                                                            |
| Iron                    |             |                                                            |
| Transferrin             |             |                                                            |
| Folic Acid              |             |                                                            |
| Vitamin B <sub>1</sub>  |             |                                                            |
| Vitamin D <sub>3</sub>  |             |                                                            |
| Vitamin B <sub>12</sub> |             |                                                            |

|                   |  |  |
|-------------------|--|--|
| Uric Acid         |  |  |
| Total Cholesterol |  |  |
| LDL               |  |  |
| HDL               |  |  |
| Triglyceride      |  |  |
| β-HCG*            |  |  |

\* Only women of childbearing potential (i.e., non-menopausal)

## Clinical evaluation

|                         |  |                   |
|-------------------------|--|-------------------|
| Hip Circumference       |  | cm                |
| Waist Circumference     |  | cm                |
| Weight                  |  | kg                |
| BMI                     |  | kg/m <sup>2</sup> |
| Mid-Thigh Circumference |  | cm                |
| VAS-Score (Leg Pain)    |  |                   |

|                                                                                                                                                                                                              |                                                      |                                                                                                                                                                                                                                                       |
|--------------------------------------------------------------------------------------------------------------------------------------------------------------------------------------------------------------|------------------------------------------------------|-------------------------------------------------------------------------------------------------------------------------------------------------------------------------------------------------------------------------------------------------------|
| Type 2 Diabetes <ul style="list-style-type: none"> <li>• Metformin</li> <li>• GLP-1 Analogue</li> <li>• Other Oral Antidiabetic Medications</li> <li>• Insulin</li> <li>• Cumulative Insulin Dose</li> </ul> |                                                      | <input type="checkbox"/> Yes <input type="checkbox"/> No<br><input type="checkbox"/> Yes <input type="checkbox"/> No<br><input type="checkbox"/> Yes <input type="checkbox"/> No<br><input type="checkbox"/> Yes <input type="checkbox"/> No<br>..... |
| Arterial Hypertension: <ul style="list-style-type: none"> <li>• Antihypertensive Medication (yes/no)</li> <li>• Number of Antihypertensive Medications</li> </ul>                                            |                                                      | <input type="checkbox"/> Yes <input type="checkbox"/> No<br>.....                                                                                                                                                                                     |
| Vomiting / Regurgitation                                                                                                                                                                                     |                                                      | No<br>≥ 1/ Week<br>≥ 1/ Month                                                                                                                                                                                                                         |
| Dysphagia (degree)                                                                                                                                                                                           | 0: Normal foods tolerated<br>1: Some foods tolerated |                                                                                                                                                                                                                                                       |

|                                         |                                                                                         |
|-----------------------------------------|-----------------------------------------------------------------------------------------|
|                                         | 2: Only soft foods tolerated<br>3: Only liquid foods tolerated<br>4: Complete dysphagia |
| Heartburn / Acid Reflux                 | No<br>≥ 1/ Week<br>≥ 1/ Month                                                           |
| Smoker<br>Pack-Years                    | <input type="checkbox"/> Yes <input type="checkbox"/> nein                              |
| Potentially confounding medication:     |                                                                                         |
| Cortisone                               | <input type="checkbox"/> Yes <input type="checkbox"/> No                                |
| Thyroid Hormone                         | <input type="checkbox"/> Yes <input type="checkbox"/> No                                |
| Lipid-Lowering Drugs                    | <input type="checkbox"/> Yes <input type="checkbox"/> No                                |
| Uric Acid Lowering Drugs                | <input type="checkbox"/> Yes <input type="checkbox"/> No                                |
| Antidepressants                         | <input type="checkbox"/> Yes <input type="checkbox"/> No                                |
| Edmonton Obesity Stage                  |                                                                                         |
| Total Score B.A.R.O.S QoL questionnaire |                                                                                         |
| Smoker<br>Pack-Years                    | <input type="checkbox"/> Yes <input type="checkbox"/> No                                |

|                                                      |                                                             |
|------------------------------------------------------|-------------------------------------------------------------|
| <b>Dumping Syndrome</b>                              | <input type="checkbox"/> Yes<br><input type="checkbox"/> No |
| <b>Endoscopic Treatment (e.g., Dilatation, BARS)</b> | <input type="checkbox"/> Yes<br><input type="checkbox"/> No |
| <b>Cholecystectomy</b>                               | <input type="checkbox"/> Yes<br><input type="checkbox"/> No |
| <b>Bariatric Revision Surgery</b>                    | <input type="checkbox"/> Yes<br><input type="checkbox"/> No |





|                            |                              |                            |
|----------------------------|------------------------------|----------------------------|
| <b>Adverse events (UE)</b> | Yes <input type="checkbox"/> | Yes → Fill out UE Protocol |
|                            | No <input type="checkbox"/>  |                            |

**Sample No. Blood:**

|  |  |  |  |
|--|--|--|--|
|  |  |  |  |
|--|--|--|--|

**Sample No. Stool:**

|  |  |  |  |
|--|--|--|--|
|  |  |  |  |
|--|--|--|--|

**Space for Notes:**

# Final protocol

Date:  /  /  = postOP day No.   
Day Month Year

Patient-ID:

Patient-Initials:  /   
Name Surname

The above mentioned patient left the study by the date mentioned above.

**The patient identified above withdrew from the study on the date identified above**

|                                         |                 |                                         |
|-----------------------------------------|-----------------|-----------------------------------------|
| <b>Reason for withdrawal from study</b> | Wish of patient | Decline to give reason<br>Reason given: |
|                                         | Other reason    | Which:                                  |

End of study protocol completed by:

\_\_\_\_\_  
 Location  /  / 20    
Day Month Year \_\_\_\_\_  
 Signature (Investigator)

## Adverse Events (UE)

Patient-ID:      |\_|\_|\_|\_|

Patient-Initials:      |\_|\_|\_|/|\_|\_|\_|

|                                             |                                                             |
|---------------------------------------------|-------------------------------------------------------------|
| <b>UE No.:</b>                              |                                                             |
| <b>UE-Description:</b>                      |                                                             |
| <b>Has the study endpoint been reached?</b> | <input type="checkbox"/> Yes<br><input type="checkbox"/> No |
| <b>SAE:</b>                                 | <input type="checkbox"/> Yes<br><input type="checkbox"/> No |

Protocol completed by

\_\_\_\_\_      |\_|\_|\_|/|\_|\_|\_|/20|\_|\_|\_|  
 Ort                      Day      Month      Year

\_\_\_\_\_  
 Signature (Investigator)
